# Supplementary material
Source: PubMed Central journal article supplement (PMC3767919)

## SUPPLEMENTAL FIGURE LEGENDS

**Supplemental Figure 1. Ki-67 staining cells in the gastric oxyntic mucosa.** We compared Ki-67 staining of proliferative cells with GFP staining of cells expressing Lgr5 transcriptional activity in sections of oxyntic mucosa from untreated Lgr5-EGFP-IRES-Cre<sup>ERT2/+</sup> mice and Lgr5-EGFP-IRES-Cre<sup>ERT2/+</sup> mice treated with either DMP-777 for 14 days or L-635 for three days. Dual immunostaining overlays for GFP and Ki-67 are shown at left and triple labeling for GFP, Ki-67 and DAPI are shown at right. No Ki-67 immunostaining was observed in any GFP-staining cells. Bar size=50µm

**Supplemental Figure 2. GFP immunostaining of cells with Lgr5 transcriptional activity in the antrum.** GFP staining of cells expressing Lgr5 transcriptional activity in sections of antral mucosa was performed for untreated Lgr5-EGFP-IRES-Cre<sup>ERT2/+</sup> mice and Lgr5-EGFP-IRES-Cre<sup>ERT2/+</sup> mice treated with either DMP-777 for 14 days or L-635 for three days. GFP staining is shown at right with dual staining of GFP and DAPI at the left. Treatment with either DMP-777 or L-635 had no affect on Lgr5-expressing cells in the antrum. Bar size=50µm

Supp Fig 1

Sup. Fig. 1

# FUNDUS

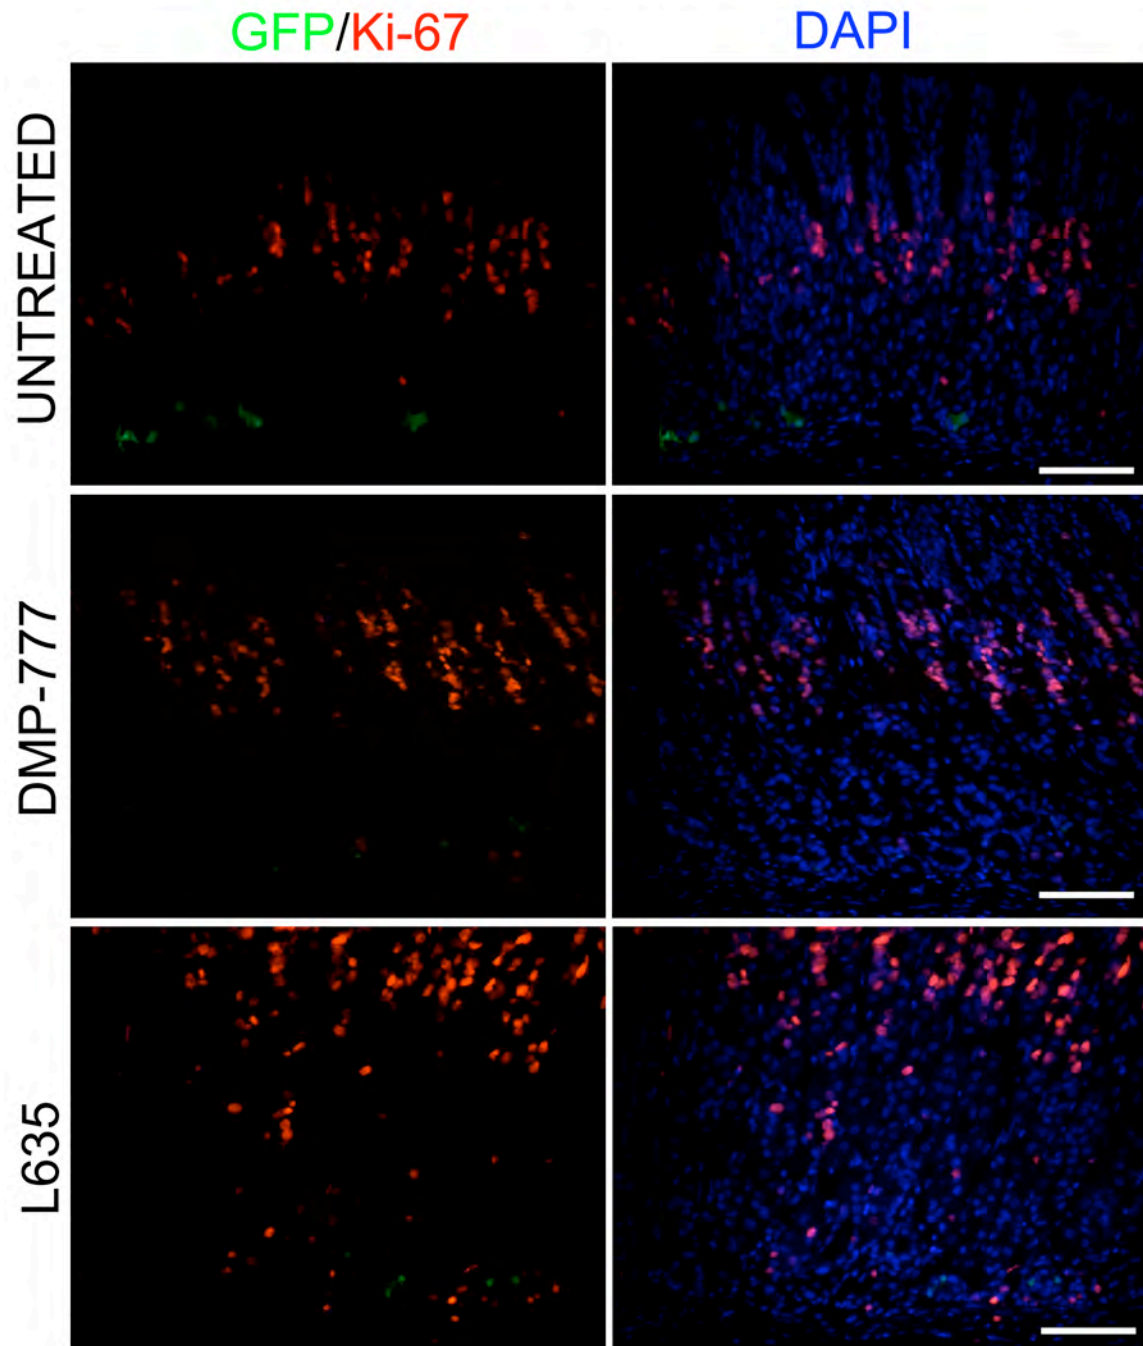

Supp Figure 2

Supp. Fig. 2

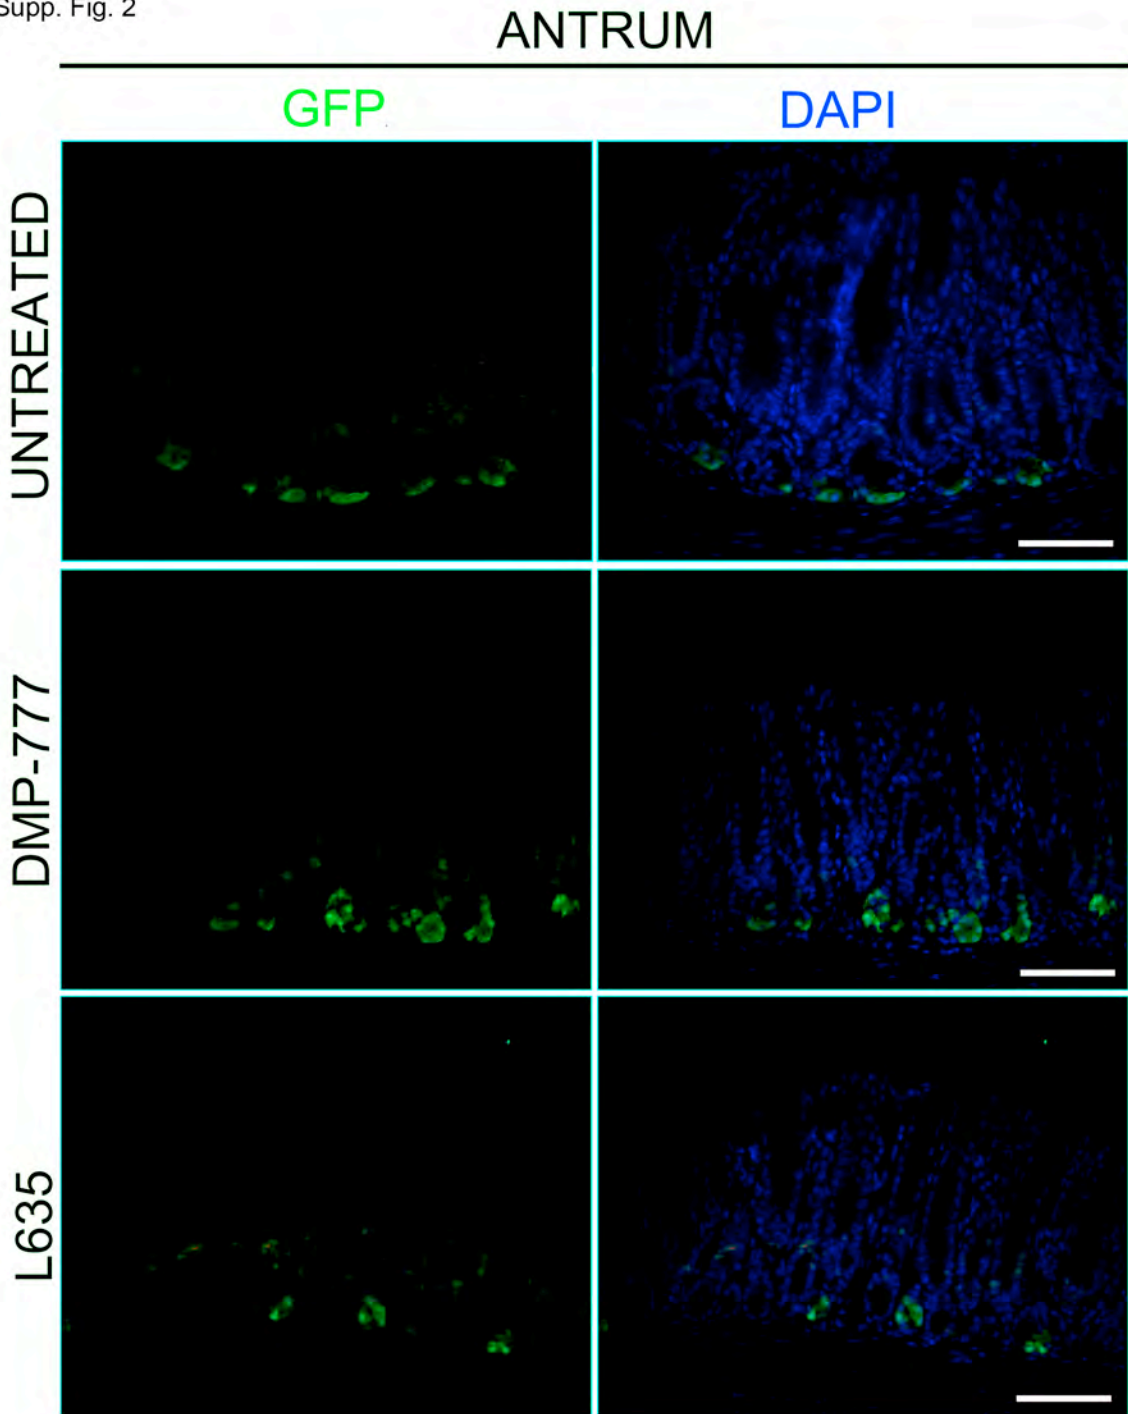

Supplement: NIHMS507644-supplement-01.pdf [file NIHMS507644-supplement-01.pdf]
